# Supplementary material
Source: Springer Nature journal article supplement (https://www.springermedizin.de/resource/supplementary/12955_2007_399_MOESM2_ESM.pdf/9560324)

**Chronic  
condition**

**HUI3  
attributes**

**Physical  
activity**

**Covariates:**

Age

Sex

BMI

Cigarette use

Alcohol consumption

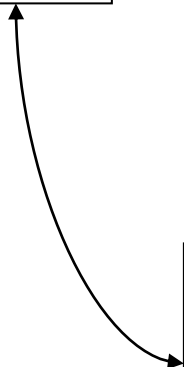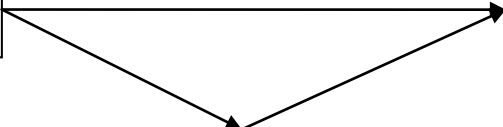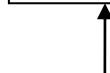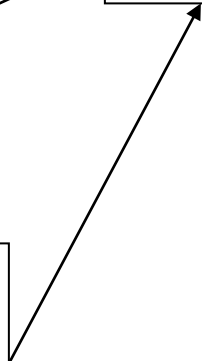

Supplement: MOESM2 [file 9560324]
